# Supplementary material for: GAT1 Gene, the GATA Transcription Activator, Regulates the Production of Higher Alcohol during Wheat Beer Fermentation by Saccharomyces cerevisiae
Source: MDPI journal article supplement (doi:10.3390/bioengineering8050061), 2021-05-08
Supplement: s1 [file s1]

Supplementary materials

# GAT1 Gene, the GATA Transcription Activator, Regulates the Production of Higher Alcohol during Wheat Beer Fermentation by *Saccharomyces cerevisiae*

Ya-Ping Wang <sup>1,†</sup>, Lin Liu <sup>2,†</sup>, Xue-Shan Wang <sup>3</sup>, Kun-Qiang Hong <sup>4</sup>, Li-Hua Zhang <sup>3</sup>, Zhong-Guan Sun <sup>3,1,5,\*</sup> and Dong-Guang Xiao <sup>1,\*</sup>

<sup>1</sup> Key Laboratory of Industrial Fermentation Microbiology, Ministry of Education, Tianjin Industrial Microbiology Key Laboratory, College of Biotechnology, Tianjin University of Science and Technology, Tianjin 300457, China; wangyapingyeah@163.com

<sup>2</sup> College of Life Science, Zaozhuang University, Zaozhuang 277160, China; zzzxyliulin@163.com

<sup>3</sup> College of Food Science and Pharmaceutical Engineering, Zaozhuang University, Zaozhuang 277160, China; wangxueshan\_1987@163.com (X.-S.W.); chinazhanglh@163.com (L.-H.Z.)

<sup>4</sup> Department of Biochemical Engineering, School of Chemical Engineering and Technology, Tianjin University, Tianjin 300072, China; leo\_hong92@163.com

<sup>5</sup> Key Laboratory of Wuliangye-favor Liquor Solid-State Fermentation, China National Light Industry, Yibin 644000, China

\* Corresponding: zhongguan115@163.com (Z.-G.S.); xdg@tust.edu.cn (D.-G.X.); Tel./Fax: +86-0632-3786399 (Z.G.S.); Tel./Fax: +86-022-60600019 (D.G.X.)

† These authors contributed equally to this work.

**Table S1.** Oligonucleotides used in this study for the construction of gene deletions.

| Name                                                           | 5'–3' DNA Sequence                               |
|----------------------------------------------------------------|--------------------------------------------------|
| <b>Oligos used for construction of gene deletion cassettes</b> |                                                  |
| SST1-U-F                                                       | GGTCCCGCTTTCCGATTT                               |
| SST1-U-R                                                       | CCTGCAGCGTACGAAGCTTCAGCTGGTGCGACTCATAGTGCTGTTATT |
| SST1-Kan-F                                                     | AATAACAGCACTATGAGTCGCACCAGCTGAAGCTTCGTACGCTGCAGG |
| SST1-Kan-R                                                     | AATAGATGTTGGGTCACAGCATAGGCCACTAGTGGATCTGATA      |
| SST1-D-F                                                       | TATCAGATCCACTAGTGGCCTATGCTGTGACCCAACATCTATT      |
| SST1-D-R                                                       | TTTCAGACACGACCAAA                                |
| SDT1-U-F                                                       | CCCTGTTCTGTTCATCGC                               |
| SDT1-U-R                                                       | CCTGCAGCGTACGAAGCTTCAGCTGGCACAATGGAGTGCCTCT      |
| SDT1-Kan-F                                                     | AGACGCACTCCATTGTGCCAGCTGAAGCTTCGTACGCTGCAGG      |
| SDT1-Kan-R                                                     | AGGTGCGACAATGTTTCAGTGGCATAGGCCACTAGTGGATCTGATA   |
| SDT1-D-F                                                       | TATCAGATCCACTAGTGGCCTATGCCACTGAACATTGTTCGCACCT   |
| SDT1-D-R                                                       | TGAAGCGGACATGGAAAG                               |
| SSP1-U-F                                                       | GGCAGCCTCACTAATCT                                |
| SSP1-U-R                                                       | CCTGCAGCGTACGAAGCTTCAGCTGTGTCCTTGGTCTGTTCT       |
| SSP1-Kan-F                                                     | AGAACAGACCAAGGACACAGCTGAAGCTTCGTACGCTGCAGG       |
| SSP1-Kan-R                                                     | CAAATACAGATACCACCCGCATAGGCCACTAGTGGATCTGATA      |
| SSP1-D-F                                                       | TATCAGATCCACTAGTGGCCTATGCGGGTGGTATCTGTATTG       |
| SSP1-D-R                                                       | TTCATCTCGCTGTCTACT                               |
| SDP1-U-F                                                       | TTCTAACTCAGGAGCCAATA                             |
| SDP1-U-R                                                       | CCTGCAGCGTACGAAGCTTCAGCTGCAGCCAACCTACCCAGAG      |
| SDP1-Kan-F                                                     | CTCTGGGTGAGTTGGCTGCAGCTGAAGCTTCGTACGCTGCAGG      |
| SDP1-Kan-R                                                     | GCTCTACGGATTCACTGGGCATAGGCCACTAGTGGATCTGATA      |
| SDP1-D-F                                                       | TATCAGATCCACTAGTGGCCTATGCCAGTGAATCCGTAGAGC       |
| SDP1-D-R                                                       | ATGACAACCCAGACAAGG                               |
| SSA9-U-F                                                       | CCCATGGGAAGTCATAG                                |

| Name                                       | 5'–3' DNA Sequence                            |
|--------------------------------------------|-----------------------------------------------|
| SSA9-U-R                                   | CCTGCAGCGTACGAAGCTTCAGCTGTGTTTCCTACCCCAATG    |
| SSA9-Kan-F                                 | CATTGGGGTAGGAAACACAGCTGAAGCTTCGTACGCTGCAGG    |
| SSA9-Kan-R                                 | CGCGACTATAACTTTTTCCCGCATAGGCCACTAGTGGATCTGATA |
| SSA9-D-F                                   | TATCAGATCCACTAGTGGCCTATGCGGGAAAAAGTTATAGTCGCG |
| SSA9-D-R                                   | CGCTACCAAAAAGAGGC                             |
| SDA9-U-F                                   | CGACTCAATGACTGCTGGTT                          |
| SDA9-U-R                                   | CCTGCAGCGTACGAAGCTTCAGCTGGAAAAGGCTGGGCGATTA   |
| SDA9-Kan-F                                 | TAATCGCCCAGCCTTTTCCAGCTGAAGCTTCGTACGCTGCAGG   |
| SDA9-Kan-R                                 | TCTTATCCAACCCTCAAAGCATAGGCCACTAGTGGATCTGATA   |
| SDA9-D-F                                   | TATCAGATCCACTAGTGGCCTATGCTTTGAGGGTTGGATAAGA   |
| SDA9-D-R                                   | GCATAGGCGATGGTGAGT                            |
| SSA10-U-F                                  | TATGAGCCGTTTCGTATGG                           |
| SSA10-U-R                                  | CAGCGTACGAAGCTTCAGCTGAGTGAGCTGCCGCTGTAG       |
| SSA10-Kan-F                                | CTACAGCGGCAGCTCACTCAGCTGAAGCTTCGTACGCTG       |
| SSA10-Kan-R                                | TGTGGTAGTGGTAAATAGCATAGGCCACTAGTGGATCTG       |
| SSA10-D-F                                  | CAGATCCACTAGTGGCCTATGCTATTTTACCACTACCACA      |
| SSA10-D-R                                  | ATACTCTTACAGCATCCT                            |
| SDA10-U-F                                  | AGTTGACGCGACTTCTGT                            |
| SDA10-U-R                                  | CCTGCAGCGTACGAAGCTTCAGCTGTGTAGGTTCCGATCACTA   |
| SDA10-Kan-F                                | TAGTGATCGGAACCTACACAGCTGAAGCTTCGTACGCTGCAGG   |
| SDA10-Kan-R                                | TGTCATCTGTGCTGCACCGCATAGGCCACTAGTGGATCTGATA   |
| SDA10-D-F                                  | TATCAGATCCACTAGTGGCCTATGCGGTGCAGCACAGATGACA   |
| SDA10-D-R                                  | CGCCCACAAGTTTCTATTTT                          |
| <b>Oligos used for diagnostic purposes</b> |                                               |
| SST1-1-F                                   | CGATGGACCCGAATCTCC                            |
| SST1-1-KanR                                | CTCAGTGGCAAATCCTAA                            |
| SST1-2-KanF                                | GGATTTGCCACTGAGGTT                            |
| SST1-2-R                                   | GCCGACCAAGTTACCAGA                            |
| SDT1-1-F                                   | CGCAGCATAGTGTTAGTG                            |
| SDT1-1-KanR                                | TTCCGTCAGCCAGTTTAG                            |
| SDT1-2-KanF                                | GAATAAAGTGGCTGACGG                            |
| SDT1-2-R                                   | AGGTCTCGGTTGCTCTTA                            |
| SSP1-1-F                                   | GATCCGGTGGAATCTATG                            |
| SSP1-1-KanR                                | TTGATGGTCGGAAGAGGC                            |
| SSP1-2-KanF                                | CGTATGTGAATGCTGGTC                            |
| SSP1-2-R                                   | TTAGTTATCGGAGTGGC                             |
| SDP1-1-F                                   | GGGGAAGTTGATTTGGTA                            |
| SDP1-1-KanR                                | CGATAGATTGTTCGCACCT                           |
| SDP1-2-KanF                                | ATGCGTCAATCGTATGTG                            |
| SDP1-2-R                                   | TACCATCTTGGCTTTGTG                            |
| SSA9-1-F                                   | GGCTCTCTGTAAATACCC                            |
| SSA9-1-KanR                                | TTGATGGTCGGAAGAGGC                            |
| SSA9-2-KanF                                | CGTATTTTCGTCTCGCTCA                           |
| SSA9-2-R                                   | GATACATCACGCGCTTC                             |
| SDA9-1-F                                   | GGCTCTCTGTAAATACCC                            |
| SDA9-1-KanR                                | TTGATGGTCGGAAGAGGC                            |
| SDA9-2-KanF                                | ACCGGATTCAGTCGTCAC                            |
| SDA9-2-R                                   | TGCCACTACCGATTCTTT                            |
| SSA10-1-F                                  | AGGGTGTGAAAAGGTGGC                            |
| SSA10-1-KanR                               | TTGATGGTCGGAAGAGGC                            |

| Name                      | 5'–3' DNA Sequence     |
|---------------------------|------------------------|
| SSA10-2-KanF              | CGTATTTTCGTCTCGCTCA    |
| SSA10-2-R                 | GCGAGTAACTAAACAAAT     |
| SDA10-1-F                 | TTAACTGATCAACCCCTCT    |
| SDA10-1-KanR              | GTGAGTCTTTTCCTTACC     |
| SDA10-2-KanF              | ATGCGTCAATCGTATGTG     |
| SDA10-2-R                 | TTGGTATGGTTGGCTTAT     |
| K-U                       | CAGCTGAAGCTTCGTACGC    |
| K-D                       | GCATAGGCCACTAGTGGATCTG |
| <b>For real-time qPCR</b> |                        |
| <i>GAT1</i> -F            | CACTTCCTGCTCGTCCTC     |
| <i>GAT1</i> -R            | GTATTATTGGCGATGCTG     |
| <i>GAP1</i> -F            | GTCCAACAGGTGGTTACAT    |
| <i>GAP1</i> -R            | AGCGGTGACGAAGACAGA     |
| <i>ARO9</i> -F            | AATGTGGAGGCTACAGGA     |
| <i>ARO9</i> -R            | ACCAATTATCGAGCAACT     |
| <i>ARO10</i> -F           | AACCCTGGTGATGTTGTC     |
| <i>ARO10</i> -R           | ATGTGAGCGTTTGAGTGG     |
| <i>ARO80</i> -F           | TGAGACCTCCACCTACCC     |
| <i>ARO80</i> -R           | TCAATCGCCTCCTCTTA      |
| <i>UBC6</i> -F            | GGACCTGCGGATACTCCTTAC  |
| <i>UBC6</i> -R            | TAATCGTGTGTTGGGCTTGA   |

Deletion or disruption was confirmed by PCR using diagnostic primers 1-F combined with 1-KanR and 2-KanF combined with 2-R.
